# Supplementary material
Source: PubMed Central journal article supplement (PMC9661887)
Supplement: NIHMS1843914-supplement-Supplemental_Material.pdf [file NIHMS1843914-supplement-Supplemental_Material.pdf]

### Supplemental Materials

*Supplemental Figure S1.* Affective visual analog scale completed after the peer evaluation task.

Circle the face which best describes how you feel right now:

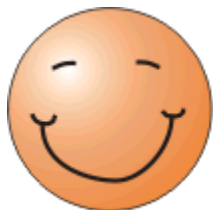

1

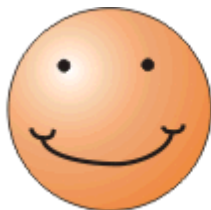

2

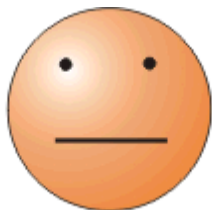

3

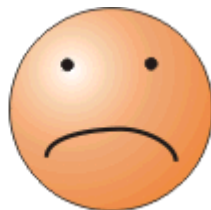

4

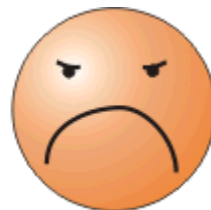

5

Supplemental Table S1. Results with CAUG as the reference group

|                                                | Simple mediation |                     | Moderated mediation |                     |
|------------------------------------------------|------------------|---------------------|---------------------|---------------------|
|                                                | $\beta$          | $b$ (95% CI)        | $\beta$             | $b$ (95% CI)        |
| <b>Effect on mediator: PEP age 12</b>          |                  |                     |                     |                     |
| FCG vs CAUG                                    | -0.10            | -.75 (-1.83, .32)   | -.10                | -.75 (-1.83, .32)   |
| NIG vs CAUG                                    | -.32**           | -2.31 (-3.88, -.90) | -.33**              | -2.32 (-3.91, -.89) |
| Sex (male)                                     | .05              | .37 (-.80, 1.48)    | .05                 | .37 (-.80, 1.48)    |
| <b>Effect on outcome: peer problems age 16</b> |                  |                     |                     |                     |
| PEP age 12                                     | .13*             | .02 (.01, .04)      | .16*                | .02 (.01, .04)      |
| FCG vs CAUG                                    | -.03             | -.04 (-.27, .19)    | -.03                | -.03 (-.25, .20)    |
| NIG vs CAUG                                    | -.19**           | -.21 (-.42, -.01)   | -.16                | -.17 (-.39, .04)    |
| Peer problems age 12                           | .24**            | .22 (.07, .38)      | .24**               | .21(.07, .38)       |
| Sex (male)                                     | .23**            | .25 (.09, .42)      | .21*                | .23 (.05, .42)      |
| FQ age 12                                      |                  |                     | -.07                | -.06 (-.20, .09)    |
| FQ X PEP                                       |                  |                     | -.17*               | -.04 (-.09, -.01)   |

Note.  $N=271$ . NIG= Never-institutionalized group. CAUG= Care as usual group. FCG= Foster care group. PEP= Pre-ejection period. FQ= Friendship quality. \*\* $p \leq .01$ . \* $p \leq .05$ .

*Supplemental Table S2.* Estimates of indirect effects comparing FCG to CAUG with bias-corrected confidence intervals derived from bootstrapping distributions.

|                                     | <i>b</i> (95% Confidence Intervals) |                                  |
|-------------------------------------|-------------------------------------|----------------------------------|
| <b>Indirect effects</b>             |                                     |                                  |
| FCG vs CAUG                         | -.015 (-.056, .003)                 |                                  |
| <b>Conditional indirect effects</b> | <u>at low FQ (-1 <i>SD</i>)</u>     | <u>at high FQ (+1 <i>SD</i>)</u> |
| FCG vs CAUG                         | -.034 (-.109, .014)                 | .000 (-.019, .040)               |

*Note.* CAUG= Care as usual group. FCG= Foster care group. FQ= Friendship quality.

*Supplemental Table S3.* Estimates of standardized indirect effects using a Bayesian estimator with two-tailed credibility intervals and one-tailed p-values derived from posterior probability distributions.

| <b>(A) Indirect effects</b>              | $\beta$                  | 95% CI        | P    |                           |               |      |
|------------------------------------------|--------------------------|---------------|------|---------------------------|---------------|------|
| CAUG vs NIG                              | .11                      | (.006, .253)  | .019 |                           |               |      |
| FCG vs NIG                               | .08                      | (.001, .191)  | .022 |                           |               |      |
| FCG vs CAUG                              | -.04                     | (-.123, .013) | .084 |                           |               |      |
| <b>(B) Conditional indirect effects:</b> | <u>at low FQ (-1 SD)</u> |               |      | <u>at high FQ (+1 SD)</u> |               |      |
|                                          | $\beta$                  | 95% CI        | P    | $\beta$                   | 95% CI        | P    |
| CAUG vs NIG                              | .21                      | (.057, .410)  | .002 | .05                       | (-.069, .188) | .202 |
| FCG vs NIG                               | .14                      | (.023, .310)  | .006 | .04                       | (-.047, .139) | .204 |
| FCG vs CAUG                              | -.07                     | (-.205, .023) | .070 | -.02                      | (-.086, .030) | .247 |

*Note.* CAUG= Care as usual group. FCG= Foster care group. FQ= Friendship quality.
